# Supplementary material
Source: Springer Nature journal article supplement (https://www.springermedizin.de/resource/supplementary/13098_2010_53_MOESM2_ESM.pdf/9670410)

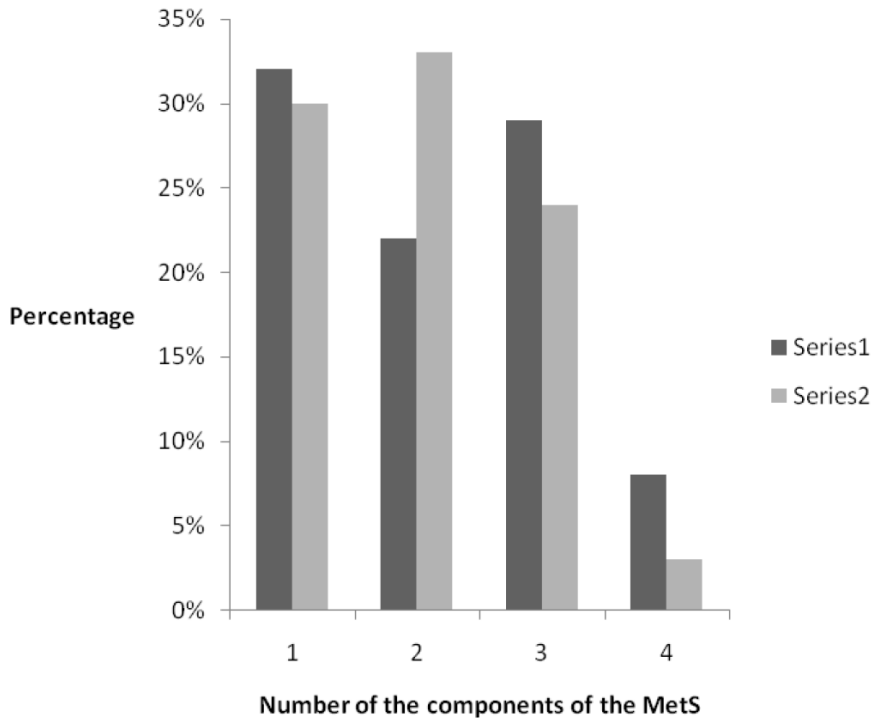

Series 1-subjects with hyperuricaemia

Series 2-subjects with normouricaemia

Supplement: MOESM2 [file 9670410]
